# Supplementary material for: Validation of a multi-ancestry polygenic risk score and age-specific risks of prostate cancer: A meta-analysis within diverse populations
Source: eLife. 2022 Jul 8;11:e78304. doi: 10.7554/eLife.78304 (PMC9322982; doi:10.7554/eLife.78304)
Supplement: Figure 2—source data 1. — Results in men of European ancestry were meta-analyzed across UK Biobank and Million Veteran Program (MVP) while results in men of African and Hispanic ancestry were estimated in MVP only. In each replication study, PRS categories were determined based on the distribution in controls. ORs and 95% CIs were estimated from logistic regression models adjusting for age and principal components of ancestry. [file elife-78304-fig2-data1.xlsx]

## Sheet: Figure 2 - Source Data 1
Figure 2 - source data 1. Association of multi-ancestry PRS and prostate cancer risk stratified by age. Results in men of European ancestry were meta-analyzed across UK Biobank and MVP while results in men of African and Hispanic ancestry were estimated in MVP only. PRS categories were determined based on the distribution in controls. Odds ratio (OR) and 95% confidence interval (95% CI) were esti…
European Ancestry
	Age ≤ 55 yrs 1,175 cases, 100,596 controls		Age 55-60 yrs 2,861 cases, 55,069 controls		Age 60-65 yrs 5,923 cases, 74,268 controls		Age 65-70 yrs 6,651 cases, 81,422 controls		Age > 70 yrs 5,079 cases, 97,957 controls
PRS Category	OR	(95% CI)	OR	(95% CI)	OR	(95% CI)	OR	(95% CI)	OR	(95% CI)
[0-10%]	0.368168	(0.24 - 0.58)	0.22248	(0.16 - 0.30)	0.266473	(0.22 - 0.32)	0.311089	(0.26 - 0.37)	0.454225	(0.38 - 0.55)
(10-20%]	0.596938	(0.41 - 0.86)	0.419371	(0.33 - 0.53)	0.437606	(0.37 - 0.51)	0.489274	(0.42 - 0.56)	0.602883	(0.51 - 0.72)
(20-30%]	0.75811	(0.54 - 1.06)	0.669892	(0.55 - 0.81)	0.532932	(0.46 - 0.62)	0.6297	(0.55 - 0.72)	0.70311	(0.60 - 0.83)
(30-40%]	0.917617	(0.67 - 1.25)	0.639245	(0.52 - 0.78)	0.804071	(0.71 - 0.91)	0.827014	(0.74 - 0.93)	0.872184	(0.75 - 1.01)
(40-60%]	1.00 (ref.)		1.00 (ref.)		1.00 (ref.)		1.00 (ref.)		1.00 (ref.)
(60-70%]	1.52248	(1.16 - 1.99)	1.37693	(1.18 - 1.61)	1.37418	(1.24 - 1.53)	1.30552	(1.18 - 1.45)	1.46081	(1.28 - 1.66)
(70-80%]	1.92836	(1.50 - 2.48)	1.6825	(1.45 - 1.95)	1.62621	(1.47 - 1.80)	1.67479	(1.52 - 1.84)	1.5355	(1.35 - 1.75)
(80-90%]	3.32557	(2.66 - 4.16)	2.27556	(1.98 - 2.61)	2.20576	(2.01 - 2.43)	2.14891	(1.96 - 2.35)	1.95202	(1.73 - 2.20)
(90-100%]	7.11224	(5.82 - 8.70)	4.25801	(3.77 - 4.81)	3.73091	(3.42 - 4.07)	3.7425	(3.45 - 4.06)	2.78572	(2.50 - 3.11)
(99%-100%]	17.2144	(13.00 - 22.79)	9.17755	(7.52 - 11.21)	7.04557	(6.06 - 8.19)	6.57698	(5.70 - 7.59)	5.43014	(4.50 - 6.55)
African Ancestry
	Age ≤ 55 yrs 989 cases, 11,007 controls		Age 55-60 yrs 1,411 cases, 9,458 controls		Age 60-65 yrs 1,724 cases, 11,349 controls		Age 65-70 yrs 1,359 cases, 10,962 controls		Age > 70 yrs 870 cases, 10,586 controls
PRS Category	OR	(95% CI)	OR	(95% CI)	OR	(95% CI)	OR	(95% CI)	OR	(95% CI)
[0-10%]	0.193084	(0.11 - 0.33)	0.35374	(0.25 - 0.49)	0.37601	(0.28 - 0.50)	0.436125	(0.32 - 0.60)	0.5066	(0.35 - 0.73)
(10-20%]	0.481492	(0.33 - 0.69)	0.412273	(0.30 - 0.56)	0.446546	(0.34 - 0.58)	0.741629	(0.57 - 0.96)	0.7224	(0.52 - 0.99)
(20-30%]	0.584206	(0.42 - 0.82)	0.657726	(0.50 - 0.86)	0.529789	(0.41 - 0.68)	0.900721	(0.70 - 1.15)	0.7196	(0.52 - 0.99)
(30-40%]	0.731055	(0.53 - 1.00)	0.567772	(0.43 - 0.75)	0.69119	(0.55 - 0.86)	0.843315	(0.66 - 1.09)	0.9181	(0.68 - 1.23)
(40-60%]	1.00 (ref.)		1.00 (ref.)		1.00 (ref.)		1.00 (ref.)		1.00 (ref.)
(60-70%]	1.26396	(0.97 - 1.64)	1.21744	(0.98 - 1.52)	1.11233	(0.92 - 1.35)	1.29337	(1.04 - 1.62)	1.3355	(1.03 - 1.74)
(70-80%]	1.69818	(1.33 - 2.18)	1.65309	(1.35 - 2.02)	1.15752	(0.96 - 1.40)	1.67553	(1.36 - 2.06)	1.44	(1.11 - 1.86)
(80-90%]	2.16275	(1.71 - 2.73)	1.76088	(1.44 - 2.15)	1.65272	(1.39 - 1.97)	1.92038	(1.57 - 2.35)	1.675	(1.31 - 2.14)
(90-100%]	3.75486	(3.04 - 4.64)	2.98492	(2.49 - 3.58)	2.43044	(2.07 - 2.86)	2.38873	(1.97 - 2.90)	2.1596	(1.71 - 2.73)
(99%-100%]	8.79721	(6.16 - 12.57)	4.45496	(3.11 - 6.39)	4.79744	(3.52 - 6.54)	3.46561	(2.34 - 5.13)	2.8696	(1.76 - 4.68)
Hispanic
	Age ≤ 55 yrs 101 cases, 4,063 controls		Age 55-60 yrs 190 cases, 2,753 controls		Age 60-65 yrs 309 cases, 3,500 controls		Age 65-70 yrs 274 cases, 4,785 controls		Age > 70 yrs 208 cases, 5,500 controls
PRS Category	OR	(95% CI)	OR	(95% CI)	OR	(95% CI)	OR	(95% CI)	OR	(95% CI)
[0-10%]	0.664827	(0.21 - 2.08)	0.12658	(0.03 - 0.53)	0.116555	(0.04 - 0.38)	0.244201	(0.10 - 0.62)	0.52	(0.27 - 1.03)
(10-20%]	0.492264	(0.14 - 1.76)	0.566709	(0.27 - 1.21)	0.344494	(0.17 - 0.71)	0.549904	(0.28 - 1.08)	0.47	(0.23 - 0.95)
(20-30%]	0.66298	(0.21 - 2.07)	0.573892	(0.27 - 1.23)	0.497143	(0.27 - 0.93)	0.933371	(0.53 - 1.65)	0.47	(0.24 - 0.95)
(30-40%]	1.2581	(0.49 - 3.23)	0.806197	(0.41 - 1.57)	0.530195	(0.29 - 0.97)	1.33549	(0.81 - 2.21)	0.81	(0.45 - 1.43)
(40-60%]	1	(1.00 - 1.00)	1	(1.00 - 1.00)	1	(1.00 - 1.00)	1	(1.00 - 1.00)	1	(1.00 - 1.00)
(60-70%]	2.16693	(0.98 - 4.81)	1.28813	(0.72 - 2.31)	1.18172	(0.74 - 1.88)	1.41106	(0.86 - 2.32)	0.86	(0.49 - 1.51)
(70-80%]	1.14976	(0.45 - 2.96)	1.71042	(0.99 - 2.95)	1.97223	(1.31 - 2.97)	2.42555	(1.56 - 3.77)	1.24	(0.75 - 2.04)
(80-90%]	2.34389	(1.08 - 5.08)	1.92618	(1.13 - 3.27)	2.09168	(1.40 - 3.13)	1.9633	(1.24 - 3.12)	1.38	(0.85 - 2.24)
(90-100%]	6.36643	(3.26 - 12.44)	3.30124	(2.06 - 5.30)	3.19944	(2.21 - 4.64)	3.09075	(2.03 - 4.70)	2.15	(1.39 - 3.32)
(99%-100%]	22.5553	(9.05 - 56.21)	4.88741	(1.95 - 12.23)	6.73852	(3.52 - 12.89)	6.42389	(3.19 - 12.94)	4.94	(2.35 - 10.40)
